# Supplementary material
Source: MDPI journal article supplement (https://www.mdpi.com/1424-2818/16/1/59)
Supplement: s1 [file s1]

Supplementary Materials

# Genetic Variation among *Aeluropus lagopoides* Populations Growing in Different Saline Regions

Basharat A. Dar, Abdullah A. Al-Doss, Abdulaziz M. Assaeed, Muhammad M. Javed, Abdelhalim I. Ghazy, Saud L. Al-Rowaily and Ahmed M. Abd-ElGawad \*

Plant Production Department, College of Food & Agriculture Sciences, King Saud University, P.O. Box 2460, Riyadh 11451, Saudi Arabia; bdar@ksu.edu.sa (B.A.D.); aaldoss@ksu.edu.sa (A.A.A.-D.); assaeed@ksu.edu.sa (A.M.A.); mjaved@ksu.edu.sa (M.M.J.); aghazy@ksu.edu.sa (A.I.G.); srowaily@ksu.edu.sa (S.L.A.-R.)

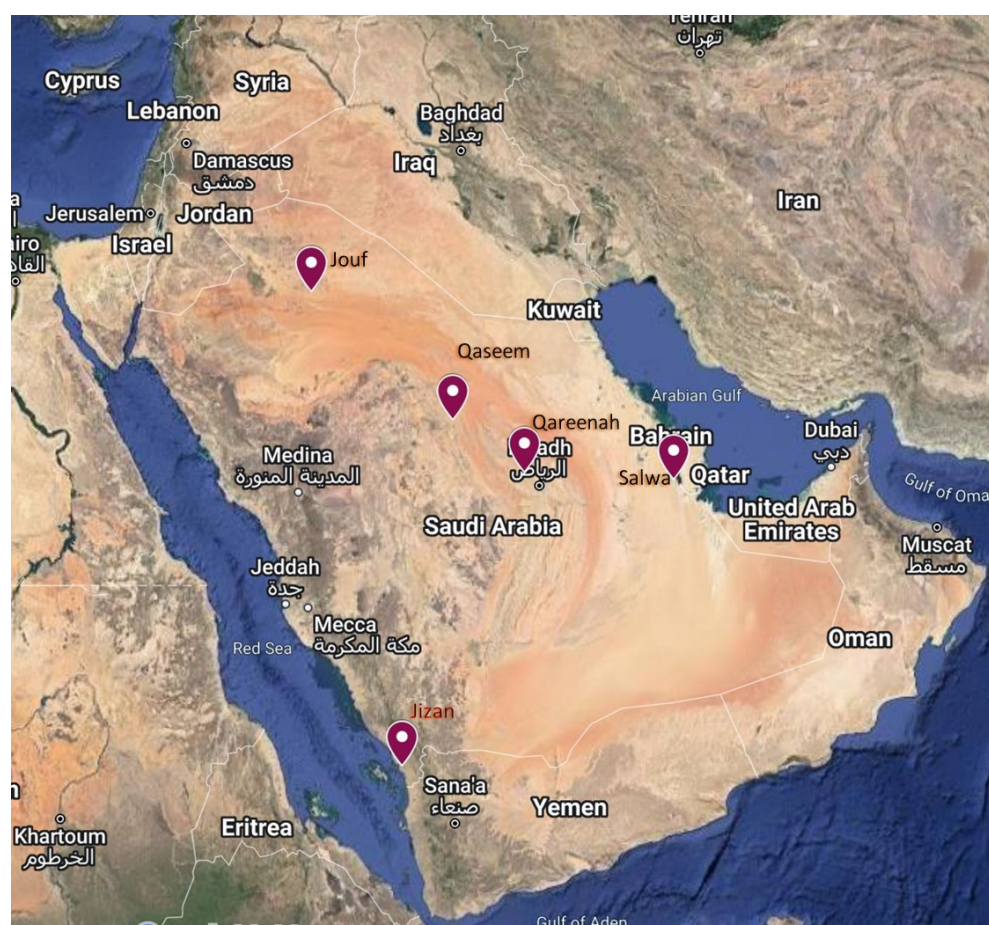

**Figure S1.** Map of different *A. lagopoides* sampled locations of Saudi Arabia: Central region inland sabkha Qareenah and Qaseem, Eastern region of Salwa, Northern region of Jouf, and Southern region of Jizan.

**Table S1.** Pairwise comparison of population based on Geographical Distance and Nei's Genetic Distance.

| Genetic Distance (ISSR)      |      |       |       |          |        |
|------------------------------|------|-------|-------|----------|--------|
|                              | Jouf | Jizan | Salwa | Qareenah | Qaseem |
| Jouf                         | 0    | 0.351 | 0.205 | 0.310    | 0.375  |
| Jizan                        | 1453 | 0     | 0.283 | 0.347    | 0.366  |
| Salwa                        | 1204 | 1250  | 0     | 0.245    | 0.282  |
| Qareenah                     | 808  | 1023  | 462   | 0        | 0.164  |
| Qaseem                       | 588  | 975   | 679   | 243      | 0      |
| Geographical Distance(km)    |      |       |       |          |        |
| Genetic Distance (SRAP)      |      |       |       |          |        |
|                              | Jouf | Jizan | Salwa | Qareenah | Qaseem |
| Jouf                         | 0    | 0.339 | 0.162 | 0.203    | 0.264  |
| Jizan                        | 1453 | 0     | 0.352 | 0.369    | 0.370  |
| Salwa                        | 1204 | 1250  | 0     | 0.166    | 0.204  |
| Qareenah                     | 808  | 1023  | 462   | 0        | 0.129  |
| Qaseem                       | 588  | 975   | 679   | 243      | 0      |
| Geographical Distance(km)    |      |       |       |          |        |
| Genetic Distance (ISSR+SRAP) |      |       |       |          |        |
|                              | Jouf | Jizan | Salwa | Qareenah | Qaseem |
| Jouf                         | 0    | 0.279 | 0.112 | 0.195    | 0.249  |
| Jizan                        | 1453 | 0     | 0.235 | 0.285    | 0.286  |
| Salwa                        | 1204 | 1250  | 0     | 0.133    | 0.161  |
| Qareenah                     | 808  | 1023  | 462   | 0        | 0.066  |
| Qaseem                       | 588  | 975   | 679   | 243      | 0      |
| Geographical Distance(km)    |      |       |       |          |        |

**Table S2.** Sample wise genetic distance of *A. lagopoides* population collected from different regions using ISSR Markers.

|        | JOUF1 | JOUF2 | JOUF3 | JOUF4 | JOUF5 | JIZN1 | JIZN2 | JIZN3 | JIZN4 | JIZN5 | SALWA1 | SALWA2 | SALWA3 | SALWA4 | SALWA5 | QAR1 | QAR2 | QAR3 | QAR4 | QAR5 | QAS1 | QAS2 | QAS3 | QAS4 | QAS5 |
|--------|-------|-------|-------|-------|-------|-------|-------|-------|-------|-------|--------|--------|--------|--------|--------|------|------|------|------|------|------|------|------|------|------|
| JOUF1  | 0     | 39    | 46    | 46    | 42    | 71    | 73    | 59    | 64    | 70    | 63     | 61     | 60     | 55     | 59     | 71   | 71   | 74   | 71   | 72   | 68   | 73   | 62   | 75   | 70   |
| JOUF2  |       | 0     | 13    | 23    | 33    | 66    | 62    | 54    | 57    | 59    | 46     | 44     | 45     | 52     | 48     | 54   | 62   | 61   | 62   | 65   | 71   | 76   | 63   | 72   | 69   |
| JOUF3  |       |       | 0     | 16    | 32    | 71    | 69    | 65    | 64    | 68    | 55     | 55     | 52     | 57     | 51     | 55   | 59   | 62   | 65   | 66   | 70   | 79   | 64   | 67   | 68   |
| JOUF4  |       |       |       | 0     | 32    | 71    | 71    | 63    | 68    | 70    | 51     | 51     | 50     | 57     | 55     | 53   | 55   | 60   | 63   | 60   | 68   | 79   | 64   | 65   | 66   |
| JOUF5  |       |       |       |       | 0     | 65    | 71    | 61    | 64    | 70    | 59     | 63     | 58     | 51     | 51     | 59   | 53   | 56   | 67   | 64   | 68   | 69   | 68   | 73   | 70   |
| JIZN1  |       |       |       |       |       | 0     | 28    | 38    | 37    | 37    | 66     | 66     | 67     | 64     | 68     | 64   | 66   | 67   | 68   | 71   | 63   | 64   | 75   | 72   | 67   |
| JIZN2  |       |       |       |       |       |       | 0     | 44    | 31    | 31    | 70     | 68     | 71     | 62     | 58     | 68   | 74   | 67   | 64   | 69   | 73   | 70   | 71   | 78   | 71   |
| JIZN3  |       |       |       |       |       |       |       | 0     | 41    | 43    | 58     | 60     | 57     | 56     | 58     | 52   | 60   | 67   | 58   | 59   | 55   | 56   | 65   | 68   | 55   |
| JIZN4  |       |       |       |       |       |       |       |       | 0     | 24    | 59     | 61     | 62     | 65     | 51     | 65   | 69   | 70   | 67   | 68   | 70   | 67   | 74   | 77   | 76   |
| JIZN5  |       |       |       |       |       |       |       |       |       | 0     | 59     | 63     | 64     | 71     | 65     | 67   | 77   | 70   | 73   | 68   | 72   | 73   | 76   | 79   | 70   |
| SALWA1 |       |       |       |       |       |       |       |       |       |       | 0      | 4      | 13     | 62     | 56     | 54   | 64   | 61   | 56   | 59   | 63   | 60   | 53   | 62   | 67   |
| SALWA2 |       |       |       |       |       |       |       |       |       |       |        | 0      | 15     | 64     | 58     | 56   | 66   | 63   | 58   | 61   | 65   | 62   | 53   | 64   | 69   |
| SALWA3 |       |       |       |       |       |       |       |       |       |       |        |        | 0      | 59     | 57     | 59   | 63   | 64   | 59   | 64   | 62   | 59   | 56   | 63   | 68   |
| SALWA4 |       |       |       |       |       |       |       |       |       |       |        |        |        | 0      | 46     | 68   | 58   | 53   | 60   | 59   | 63   | 68   | 55   | 70   | 69   |
| SALWA5 |       |       |       |       |       |       |       |       |       |       |        |        |        |        | 0      | 50   | 64   | 61   | 50   | 57   | 69   | 76   | 63   | 76   | 69   |
| QAR1   |       |       |       |       |       |       |       |       |       |       |        |        |        |        |        | 0    | 36   | 39   | 34   | 47   | 59   | 66   | 61   | 62   | 57   |
| QAR2   |       |       |       |       |       |       |       |       |       |       |        |        |        |        |        |      | 0    | 29   | 32   | 35   | 49   | 46   | 49   | 42   | 41   |
| QAR3   |       |       |       |       |       |       |       |       |       |       |        |        |        |        |        |      |      | 0    | 37   | 42   | 56   | 53   | 48   | 53   | 50   |
| QAR4   |       |       |       |       |       |       |       |       |       |       |        |        |        |        |        |      |      |      | 0    | 37   | 49   | 48   | 41   | 46   | 41   |
| QAR5   |       |       |       |       |       |       |       |       |       |       |        |        |        |        |        |      |      |      |      | 0    | 52   | 51   | 44   | 43   | 48   |
| QAS1   |       |       |       |       |       |       |       |       |       |       |        |        |        |        |        |      |      |      |      |      | 0    | 41   | 52   | 31   | 42   |
| QAS2   |       |       |       |       |       |       |       |       |       |       |        |        |        |        |        |      |      |      |      |      |      | 0    | 41   | 44   | 37   |
| QAS3   |       |       |       |       |       |       |       |       |       |       |        |        |        |        |        |      |      |      |      |      |      |      | 0    | 41   | 38   |
| QAS4   |       |       |       |       |       |       |       |       |       |       |        |        |        |        |        |      |      |      |      |      |      |      |      | 0    | 39   |
| QAS5   |       |       |       |       |       |       |       |       |       |       |        |        |        |        |        |      |      |      |      |      |      |      |      |      | 0    |

ISSR: Inter-simple sequence repeat, QAR: Qareenah, QAS: Qaseem.

**Table S3.** Sample wise genetic distance of *A. lagopoides* population collected from different regions using SRAP Markers.

|        | JOUF1 | JOUF2 | JOUF3 | JOUF4 | JOUF5 | JIZN1 | JIZN2 | JIZN3 | JIZN4 | JIZN5 | SALWA1 | SALWA2 | SALWA3 | SALWA4 | SALWA5 | QAR1 | QAR2 | QAR3 | QAR4 | QAR5 | QAS1 | QAS2 | QAS3 | QAS4 | QAS5 |
|--------|-------|-------|-------|-------|-------|-------|-------|-------|-------|-------|--------|--------|--------|--------|--------|------|------|------|------|------|------|------|------|------|------|
| JOUF1  | 0     |       |       |       |       |       |       |       |       |       |        |        |        |        |        |      |      |      |      |      |      |      |      |      |      |
| JOUF2  | 23    | 0     |       |       |       |       |       |       |       |       |        |        |        |        |        |      |      |      |      |      |      |      |      |      |      |
| JOUF3  | 23    | 22    | 0     |       |       |       |       |       |       |       |        |        |        |        |        |      |      |      |      |      |      |      |      |      |      |
| JOUF4  | 21    | 26    | 20    | 0     |       |       |       |       |       |       |        |        |        |        |        |      |      |      |      |      |      |      |      |      |      |
| JOUF5  | 21    | 18    | 18    | 18    | 0     |       |       |       |       |       |        |        |        |        |        |      |      |      |      |      |      |      |      |      |      |
| JIZN1  | 52    | 43    | 41    | 39    | 39    | 0     |       |       |       |       |        |        |        |        |        |      |      |      |      |      |      |      |      |      |      |
| JIZN2  | 53    | 42    | 44    | 44    | 46    | 17    | 0     |       |       |       |        |        |        |        |        |      |      |      |      |      |      |      |      |      |      |
| JIZN3  | 49    | 40    | 38    | 42    | 40    | 17    | 16    | 0     |       |       |        |        |        |        |        |      |      |      |      |      |      |      |      |      |      |
| JIZN4  | 54    | 49    | 43    | 51    | 45    | 22    | 23    | 21    | 0     |       |        |        |        |        |        |      |      |      |      |      |      |      |      |      |      |
| JIZN5  | 44    | 39    | 31    | 37    | 35    | 24    | 27    | 17    | 22    | 0     |        |        |        |        |        |      |      |      |      |      |      |      |      |      |      |
| SALWA1 | 28    | 29    | 25    | 31    | 29    | 46    | 45    | 35    | 44    | 30    | 0      |        |        |        |        |      |      |      |      |      |      |      |      |      |      |
| SALWA2 | 26    | 33    | 27    | 27    | 29    | 48    | 51    | 41    | 46    | 32    | 10     | 0      |        |        |        |      |      |      |      |      |      |      |      |      |      |
| SALWA3 | 31    | 32    | 28    | 24    | 28    | 47    | 44    | 38    | 47    | 35    | 15     | 11     | 0      |        |        |      |      |      |      |      |      |      |      |      |      |
| SALWA4 | 43    | 36    | 32    | 32    | 36    | 49    | 46    | 44    | 49    | 39    | 25     | 29     | 24     | 0      |        |      |      |      |      |      |      |      |      |      |      |
| SALWA5 | 32    | 41    | 27    | 27    | 35    | 54    | 51    | 43    | 56    | 44    | 26     | 26     | 21     | 27     | 0      |      |      |      |      |      |      |      |      |      |      |
| QAR1   | 40    | 35    | 31    | 39    | 37    | 54    | 49    | 41    | 58    | 42    | 32     | 36     | 31     | 37     | 22     | 0    |      |      |      |      |      |      |      |      |      |
| QAR2   | 38    | 27    | 25    | 35    | 29    | 46    | 47    | 45    | 48    | 38    | 32     | 36     | 33     | 33     | 32     | 24   | 0    |      |      |      |      |      |      |      |      |
| QAR3   | 36    | 35    | 33    | 41    | 35    | 50    | 45    | 41    | 52    | 40    | 28     | 32     | 31     | 33     | 30     | 18   | 22   | 0    |      |      |      |      |      |      |      |
| QAR4   | 41    | 32    | 30    | 40    | 32    | 47    | 44    | 36    | 53    | 39    | 29     | 37     | 34     | 36     | 25     | 11   | 19   | 25   | 0    |      |      |      |      |      |      |
| QAR5   | 36    | 29    | 27    | 33    | 31    | 44    | 47    | 41    | 50    | 34    | 22     | 30     | 31     | 31     | 26     | 24   | 22   | 26   | 23   | 0    |      |      |      |      |      |
| QAS1   | 50    | 45    | 43    | 39    | 45    | 46    | 45    | 41    | 48    | 36    | 32     | 36     | 29     | 35     | 32     | 34   | 34   | 40   | 33   | 32   | 0    |      |      |      |      |
| QAS2   | 46    | 33    | 35    | 43    | 35    | 52    | 51    | 47    | 54    | 42    | 34     | 36     | 33     | 37     | 40     | 26   | 26   | 26   | 31   | 26   | 32   | 0    |      |      |      |
| QAS3   | 46    | 37    | 37    | 43    | 39    | 54    | 53    | 47    | 58    | 42    | 34     | 36     | 33     | 35     | 34     | 24   | 26   | 24   | 29   | 28   | 28   | 14   | 0    |      |      |
| QAS4   | 49    | 44    | 42    | 44    | 38    | 45    | 48    | 44    | 47    | 45    | 49     | 49     | 44     | 44     | 43     | 37   | 31   | 37   | 40   | 41   | 39   | 29   | 35   | 0    |      |
| QAS5   | 39    | 40    | 36    | 40    | 36    | 51    | 50    | 48    | 55    | 43    | 33     | 33     | 34     | 40     | 37     | 35   | 27   | 27   | 36   | 31   | 35   | 27   | 25   | 34   | 0    |

SRAP: Sequence-related amplified polymorphism analysis, QAR: Qareenah, QAS: Qaseem
